# Supplementary material for: Diffusion doping in quantum dots: bond strength and diffusivity
Source: Royal Society of Chemistry journal article supplement (doi:10.1039/c6nr09839h), 2017-01-01
Supplement: c6nr09839h1.pdf [file c6nr09839h1.pdf]

## Supplementary Information

### **Diffusion Doping in Quantum Dots: Bond Strength and Diffusivity**

Avijit Saha,<sup>a</sup> Mahima Makkar,<sup>a</sup> Amitha Shetty,<sup>b</sup> Kushagra Gahlot,<sup>a</sup> Pavan A.R.<sup>b</sup> and Ranjani Viswanatha.<sup>a,b,\*</sup>

<sup>a</sup> New Chemistry Unit, <sup>b</sup>International Centre for Materials Science, Jawaharlal Nehru Centre for Advanced Scientific Research, Jakkur, Bangalore 560064, India

#### AUTHOR INFORMATION

##### **Corresponding Author**

\*E-mail: [rv@jncasr.ac.in](mailto:rv@jncasr.ac.in)

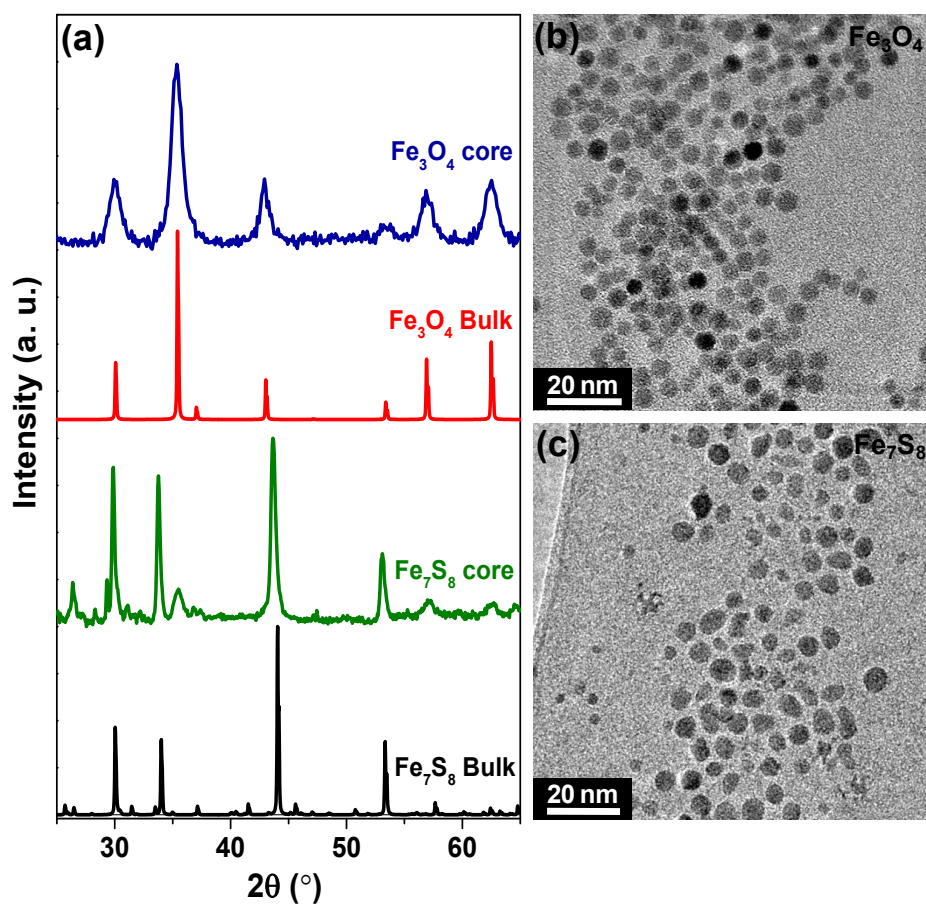

**Figure S 1.** (a) XRD pattern of  $\text{Fe}_3\text{O}_4$  and  $\text{Fe}_7\text{S}_8$  core. TEM image of (b)  $\text{Fe}_3\text{O}_4$  and (c)  $\text{Fe}_7\text{S}_8$  core nanoparticles.

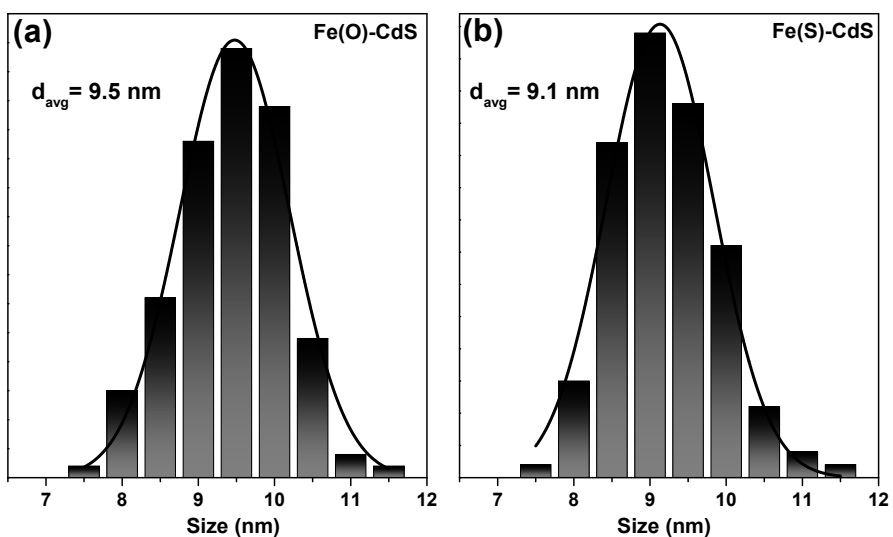

**Figure S2.** Size distribution histogram of (a) Fe(O)-CdS and (b) Fe(S)-CdS nanoparticles.

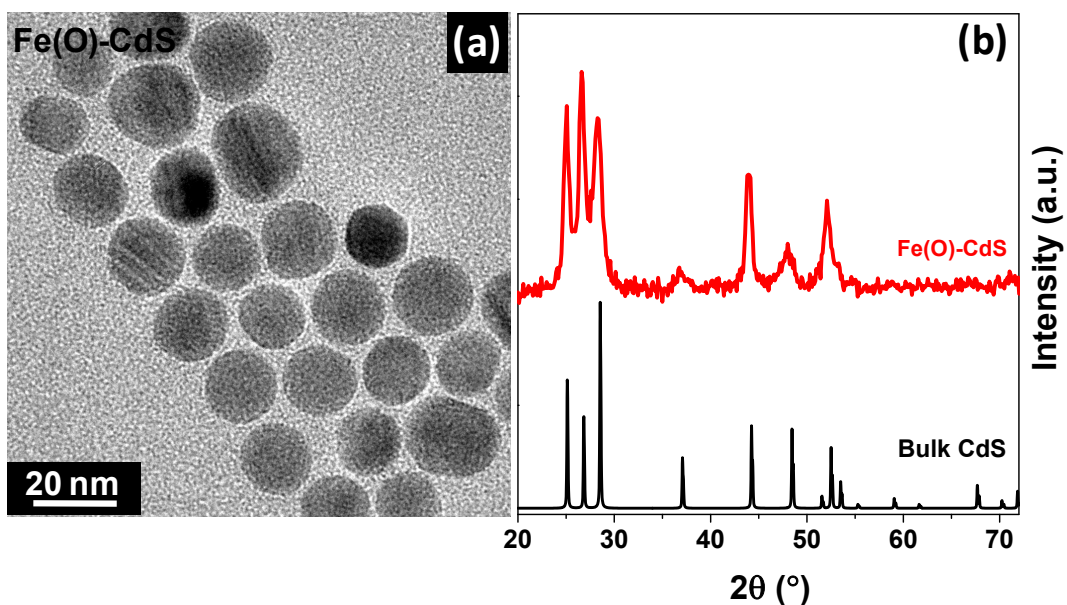

**Figure S3.** (a) TEM image of Fe(O)-CdS (Fe-2%) and its corresponding (b) XRD spectra.

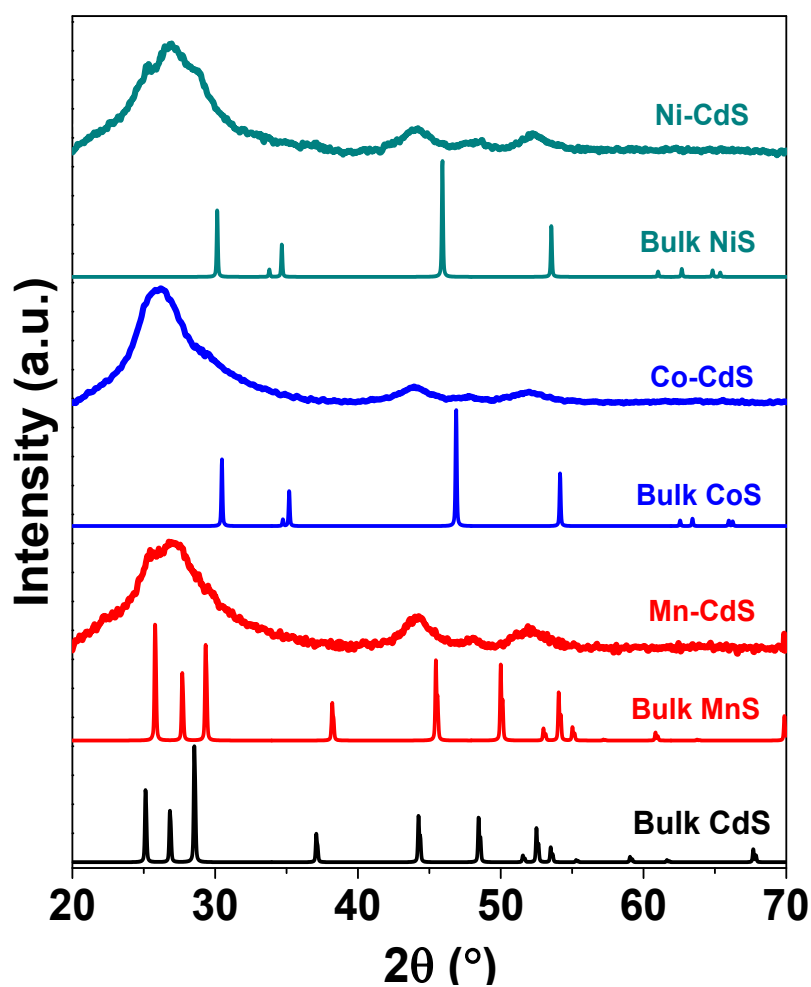

**Figure S4:** X-ray diffraction spectra XRD spectra of Ni<sup>2+</sup> (cyan), Co<sup>2+</sup> (blue) and Mn<sup>2+</sup> (red) doped CdS QDs and comparison with different standard bulk spectra obtained from ICSD database.

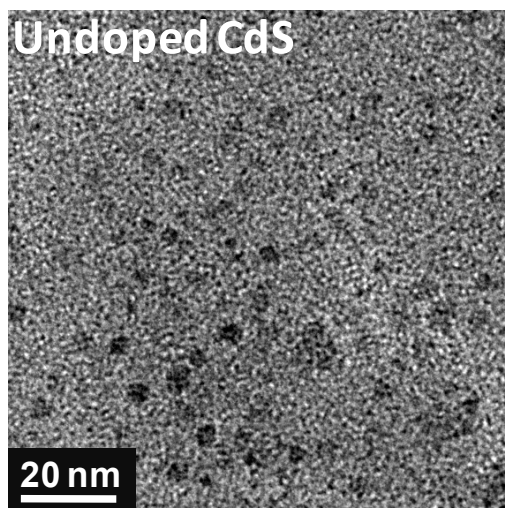

Figure S5. TEM image of undoped CdS.

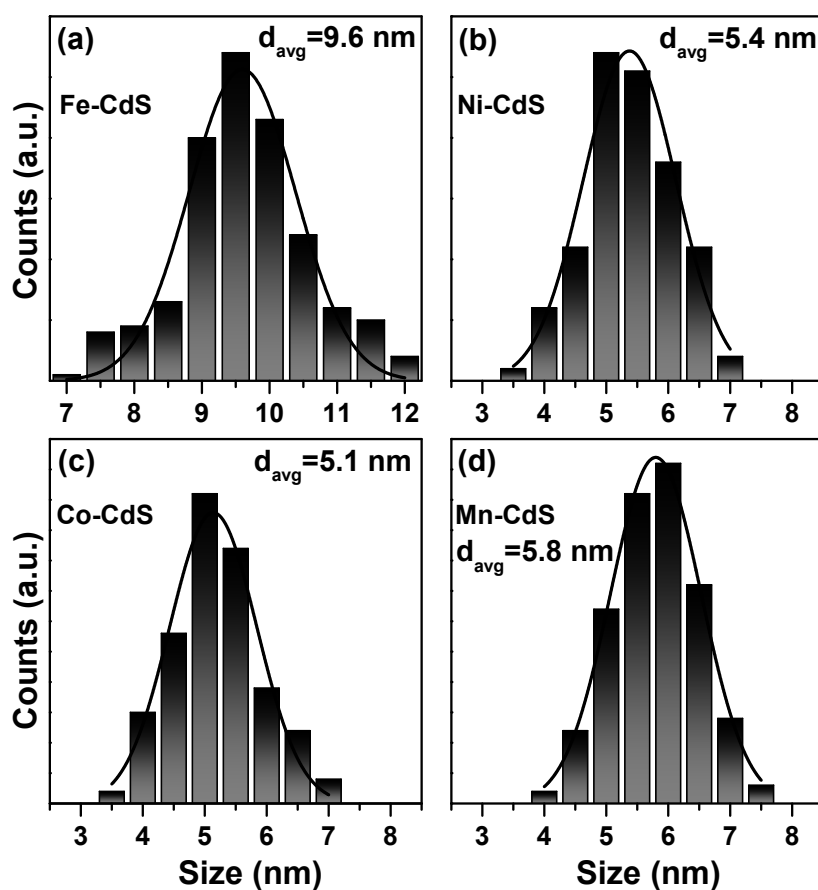

Figure S6. Size distribution histogram of (a) Fe-CdS (b) Ni-CdS (c) Co-CdS (d) Mn-CdS.

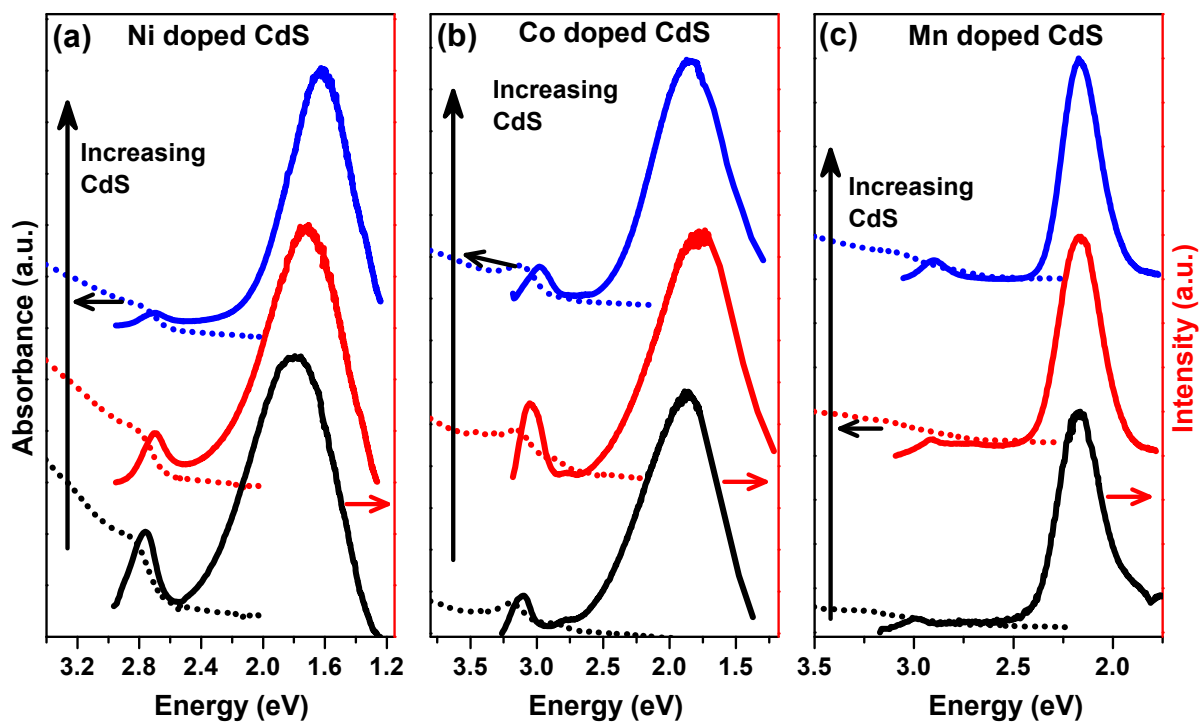

**Figure S7.** Evolution change in steady state PL (solid line) and absorption (dotted line) of (a)  $\text{Ni}^{2+}$ , (b)  $\text{Co}^{2+}$  and (c)  $\text{Mn}^{2+}$  doped nanocrystals with increasing addition of Cd and S cycle.

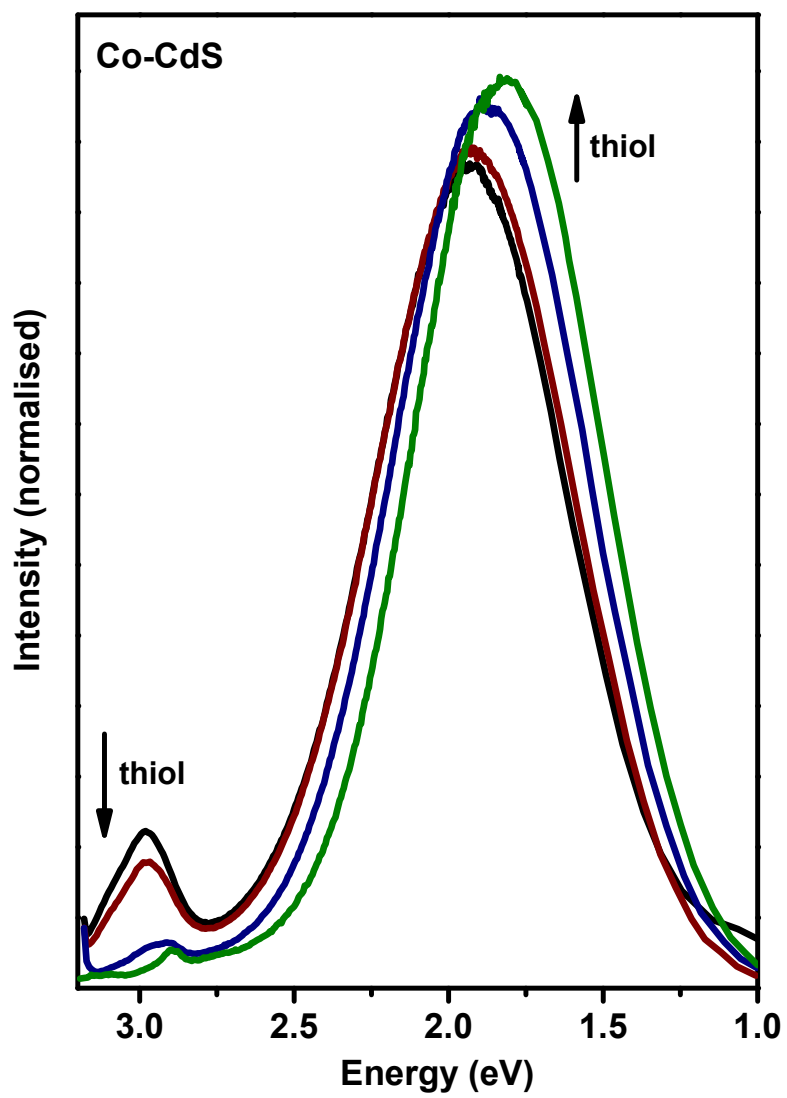

**Figure S8.** (a) Variation of Area normalised PL spectra of  $\text{Co}^{2+}$  doped CdS with addition of thioglycerol.

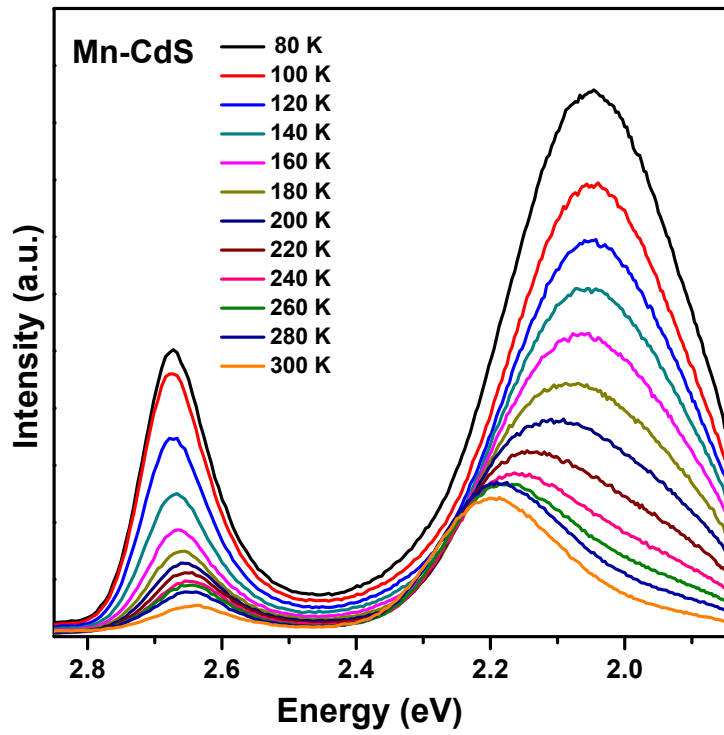

**Figure S9.** (a) Variation of PL spectra of Mn<sup>2+</sup> doped CdS measured at different temperatures.
